# Supplementary material for: ELF5 is a potential respiratory epithelial cell-specific risk gene for severe COVID-19
Source: PubMed Central journal article supplement (PMC9378714; doi:10.1038/s41467-022-31999-6), 2022-08-15
Supplement: 41467_2022_31999_MOESM1_ESM.pdf [file 41467_2022_31999_MOESM1_ESM.pdf]

## Supplementary Material

### ***ELF5* is a potential respiratory epithelial cell-specific risk gene for severe COVID-19**

Maik Pietzner<sup>1,2,a</sup>, Robert Lorenz Chua<sup>3,a</sup>, Eleanor Wheeler<sup>2</sup>, Katharina Jechow<sup>3</sup>, Julian D.S. Willett<sup>4,5</sup>, Helena Radbruch<sup>6</sup>, Saskia Trump<sup>7</sup>, Bettina Heidecker<sup>8</sup>, Hugo Zeberg<sup>9,10</sup>, Frank L. Heppner<sup>6,11,12</sup>, Roland Eils<sup>3,13,14</sup>, Marcus A. Mall<sup>14,15,16</sup>, J Brent Richards<sup>4,5,17,18</sup>, Leif-Erik Sander<sup>19</sup>, Irina Lehmann<sup>7,14</sup>, Sören Lukassen<sup>3</sup>, Nick Wareham<sup>2</sup>, Christian Conrad<sup>3,b</sup>, Claudia Langenberg<sup>1,2,b</sup>

#### **Affiliations**

<sup>1</sup>Computational Medicine, Berlin Institute of Health (BIH) at Charité – Universitätsmedizin Berlin, Germany

<sup>2</sup>MRC Epidemiology Unit, University of Cambridge, Cambridge, UK

<sup>3</sup>Center for Digital Health, Berlin Institute of Health (BIH) at Charité – Universitätsmedizin Berlin, Germany

<sup>4</sup>McGill Genome Centre, McGill University, Montréal, Québec Canada

<sup>5</sup>Lady Davis Institute, Jewish General Hospital, Montréal, Québec Canada

<sup>6</sup>Department of Neuropathology, Charité – Universitätsmedizin Berlin, corporate member of Freie Universität Berlin und Humboldt-Universität zu Berlin, Berlin, Germany

<sup>7</sup>Molecular Epidemiology Unit, Charité - Universitätsmedizin Berlin, corporate member of Freie Universität Berlin, Humboldt-Universität zu Berlin and Berlin Institute of Health (BIH), Berlin, Germany

<sup>8</sup>Department of Cardiology, Charité – Universitätsmedizin Berlin, corporate member of Freie Universität Berlin und Humboldt-Universität zu Berlin, Berlin, Germany

<sup>9</sup>Max Planck Institute for Evolutionary Anthropology, Leipzig, Germany

<sup>10</sup>Department of Neuroscience, Karolinska Institutet, Stockholm, Sweden

<sup>11</sup>Cluster of Excellence, NeuroCure, Berlin, Germany

<sup>12</sup>German Center for Neurodegenerative Diseases (DZNE) Berlin, Berlin, Germany

<sup>13</sup>Health Data Science Unit, Heidelberg University Hospital and BioQuant, Heidelberg, Germany

<sup>14</sup>German Center for Lung Research (DZL), associated partner site, Augustenburger Platz 1, 13353 Berlin, Germany

<sup>15</sup>Department of Pediatric Respiratory Medicine, Immunology and Critical Care Medicine, Charité-Universitätsmedizin Berlin, corporate member of Freie Universität Berlin und Humboldt-Universität zu Berlin, Berlin, Germany

<sup>16</sup>Berlin Institute of Health at Charité – Universitätsmedizin Berlin, Berlin, Germany

<sup>17</sup>Department of Epidemiology, Biostatistics and Occupational Health, McGill University, Montréal, Québec, Canada.

<sup>18</sup>Department of Twin Research, King's College London, London, United Kingdom.

<sup>19</sup>Department of Infectious Diseases and Respiratory Medicine, Charité - Universitätsmedizin Berlin, corporate member of Freie Universität Berlin, Humboldt-Universität zu Berlin, and Berlin Institute of Health (BIH), Berlin, Germany

<sup>a</sup>these authors contributed equally to this work; <sup>b</sup>these authors jointly supervised this work

#### **Correspondence**

Prof Claudia Langenberg ([claudia.langenberg@bih-charite.de](mailto:claudia.langenberg@bih-charite.de))

Prof Christian Conrad ([christian.conrad@bih-charite.de](mailto:christian.conrad@bih-charite.de))

Dr Maik Pietzner ([maik.pietzner@bih-charite.de](mailto:maik.pietzner@bih-charite.de))

## TABLES

| Phenotype                                           | short | cases   | controls  | case definition                                                                                                                                                                                                                                                                                                                                                                                                                                                                                                                                                                                                                                                        |
|-----------------------------------------------------|-------|---------|-----------|------------------------------------------------------------------------------------------------------------------------------------------------------------------------------------------------------------------------------------------------------------------------------------------------------------------------------------------------------------------------------------------------------------------------------------------------------------------------------------------------------------------------------------------------------------------------------------------------------------------------------------------------------------------------|
| Severe COVID-19 vs. population                      | A2    | 8,779   | 1,001,875 | Very severe COVID-19 cases were defined as hospitalized individuals with COVID-19 as the primary reason for hospital admission with laboratory-confirmed SARS-CoV-2 infection (nucleic acid amplification tests or serology based) and death or respiratory support (invasive ventilation, continuous positive airway pressure, bilevel positive airway pressure or continuous external negative pressure, high-flow nasal or face mask oxygen). Simple supplementary oxygen (for example, 2 L min <sup>-1</sup> via nasal cannula) did not qualify for case status. Controls were all individuals in the participating cohorts who did not meet this case definition. |
| hospitalized COVID-19 vs. not hospitalized COVID-19 | B1    | 14,480  | 73,191    | Hospitalized COVID-19 cases were defined as individuals hospitalized with laboratory-confirmed SARS-CoV-2 infection (using the same microbiology methods as for the very severe phenotype), where hospitalization was due to COVID-19-related symptoms. Controls were all individuals with laboratory confirmed COVID-19, but did not require hospitalisation.                                                                                                                                                                                                                                                                                                         |
| hospitalized COVID-19 vs. population                | B2    | 24,274  | 2,061,529 | Hospitalized COVID-19 cases were defined as individuals hospitalized with laboratory-confirmed SARS-CoV-2 infection (using the same microbiology methods as for the very severe phenotype), where hospitalization was due to COVID-19-related symptoms. Controls were all individuals in the participating cohorts who did not meet this case definition.                                                                                                                                                                                                                                                                                                              |
| confirmed SARS-CoV-2 infection vs. population       | C2    | 112,612 | 2,474,079 | Susceptibility to COVID-19 cases was defined as individuals with laboratory-confirmed SARS-CoV-2 infection, health record evidence of COVID-19 (ICD coding or physician confirmation) or with self-reported infections (for example, by questionnaire). Controls were all individuals who did not meet this case definition.                                                                                                                                                                                                                                                                                                                                           |

**Supplementary Table 1** Summary of COVID-19 endpoints from the COVID-19 Host genetics initiative - release 6

| Patient ID | Disease  | Sex    | Age   | COVID-19 main cause of death | Tissue      | SARS-CoV-2 PCR mucosa | SARS-CoV-2 PCR lung |
|------------|----------|--------|-------|------------------------------|-------------|-----------------------|---------------------|
| C19-1      | COVID-19 | Male   | 71-80 | yes                          | Lung        | -                     | pos                 |
| C19-2      | COVID-19 | Male   | 71-80 | yes                          | Lung        | -                     | pos                 |
| C19-3      | COVID-19 | Male   | 51-60 | yes                          | Olf. Mucosa | pos                   | -                   |
| C19-4      | COVID-19 | Male   | 81-90 | yes                          | Olf. Mucosa | neg                   | -                   |
| Control 1  | Control  | Male   | 31-40 | no                           | Lung        | -                     | -                   |
| Control 2  | Control  | Female | 61-70 | no                           | Lung        | -                     | -                   |
| Control 3  | Control  | Female | 71-80 | no                           | Olf. Mucosa | neg                   | -                   |
| Control 4  | Control  | Female | 71-80 | no                           | Olf. Mucosa | neg                   | -                   |

**Supplementary Table 2** Patient characteristics

| <b>Antigen/Target</b>                     | <b>Host</b> | <b>Dilution</b> | <b>Catalog Number</b>               |
|-------------------------------------------|-------------|-----------------|-------------------------------------|
| KRT18                                     | Mouse       | 1:100           | Abcam, ab668                        |
| SFTPC                                     | Mouse       | 1:100           | ThermoFisher, PA5-71680             |
| EPCAM                                     | Mouse       | 1:100           | ThermoFischer, MA5-12436            |
| SCGB1A1                                   | Mouse       | 1:100           | Santa Cruz Biotechnology, sc-365992 |
| ELF5                                      | Rabbit      | 1:100           | ThermoFisher, 720380                |
| TMPRSS2                                   | Mouse       | 1:100           | Sigma, HPA035787-100UL              |
| ACE2                                      | Rabbit      | 1:100           | Abcam, ab15348                      |
| AlexaFluor 488 Goat anti-Rabbit IgG (H+L) | Goat        | 1:500           | Life Technologies, A11034           |
| AlexaFluor 568 Goat anti-Mouse IgG (H+L)  | Goat        | 1:500           | Life Technologies, A11004           |

**Supplementary Table 3** List of antibodies used for staining experiments

**FIGURES**

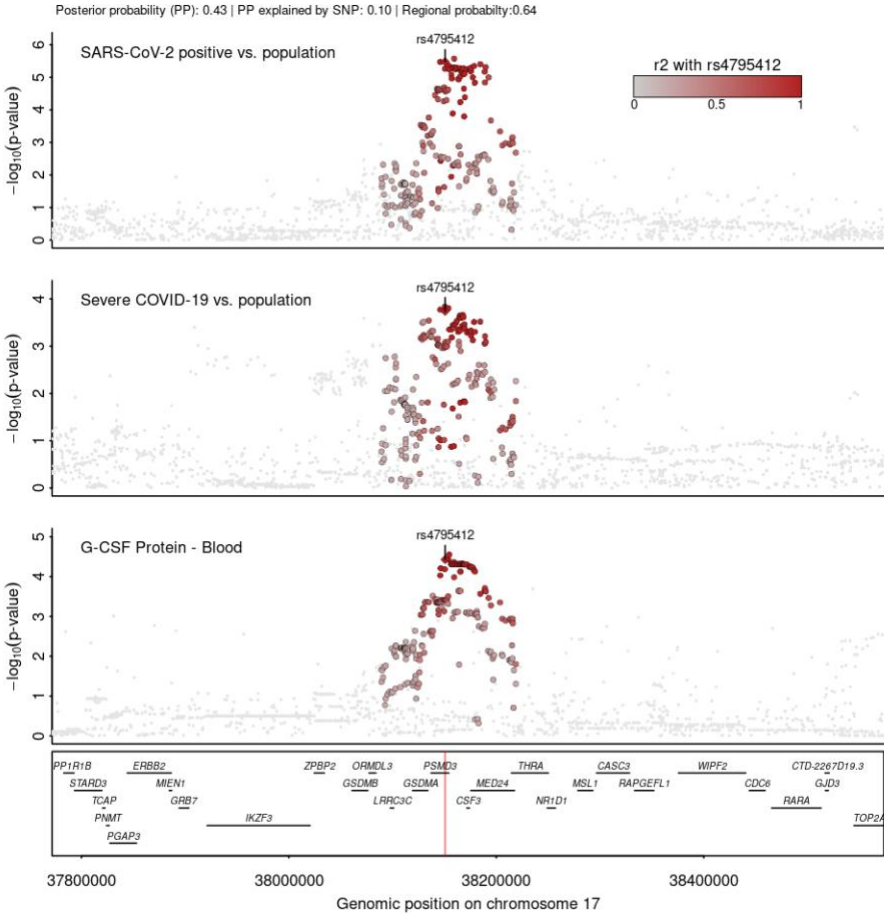

**Supplementary Figure 1 Stacked regional association plots at *CSF3*.** Each panel contains regional association statistics from linear regression analysis (p-values) for the trait listed in the upper left corner along genomic coordinates. Each dot represents a single nucleotide polymorphisms and colours indicate linkage disequilibrium (LD;  $r^2$ ) with the most likely causative variant (rs4795412) at this locus (darker colours stronger LD). LD was calculated based on 8,350 unrelated white-British participants of the Fenland cohort.

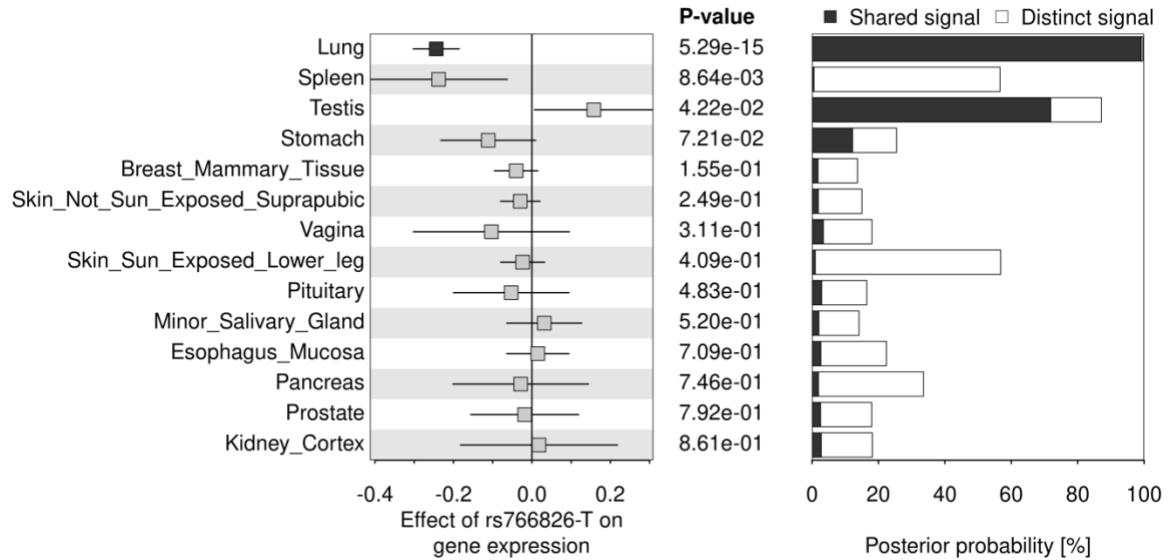

**Supplementary Figure 2** Summary of cross-tissue colocalisation for ELF5. The left panel shows effect estimates (rectangles) and 95%-CIs (lines) from linear regression models for rs766826 on *ELF5* expression in all tissues with detectable levels in the GTEx v8 resource. Significant effects ( $p < 0.001$ ) are highlighted in black. The left-hand side shows posterior probabilities for testing for a shared genetic signal between ELF5 abundance in plasma and *ELF5* expression in each tissue using statistical colocalisation. Sample sizes from GTEx v8 were as follows: Lung (n=515), Spleen (n=227), Testis (n=322), Stomach (n=324), Breast\_Mammary\_Tissue (n=396), Skin\_Not\_Sun\_Exposed\_Suprapubic (n=517), Vagina (n=141), Skin\_Sun\_Exposed\_Lower\_leg (n=605), Pituitary (n=237), Minor\_Salivary\_Gland (n=144), Esophagus\_Mucosa (n=497), Pancreas (n=305), Prostate (n=221), Kidney\_Cortex (n=73)

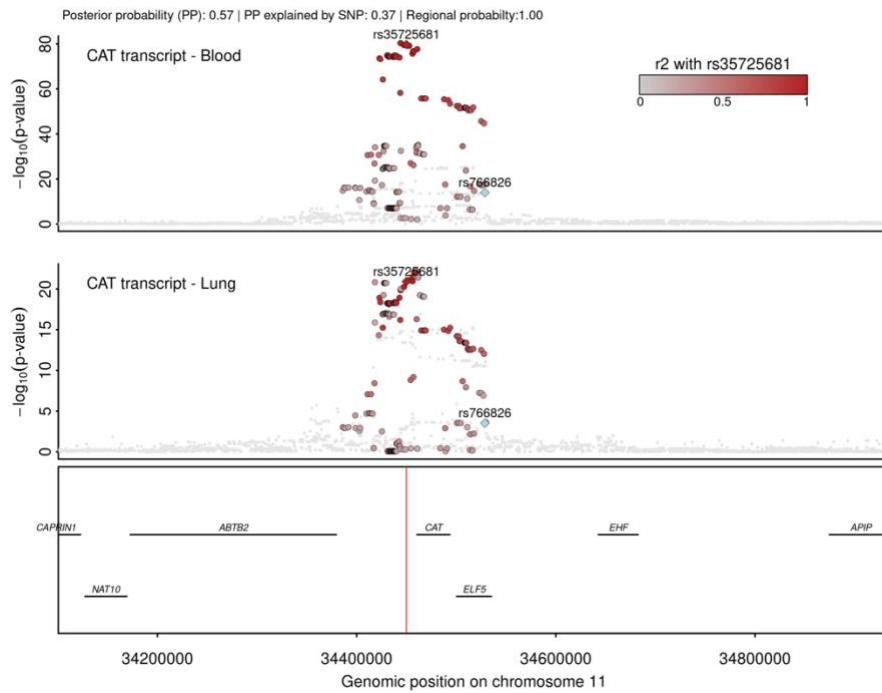

**Supplementary Figure 3 Stacked regional association plots at *CAT*.** Each panel contains regional association statistics from linear regression analysis (p-values) for the trait listed in the upper left corner along genomic coordinates. Each dot represents a single nucleotide polymorphisms and colours indicate linkage disequilibrium (LD;  $r^2$ ) with the most likely causative variant (rs35725681) at this locus (darker colours stronger LD). Summary statistics have been obtained from the GTEx v8 consortium<sup>1</sup>. The most likely causal variant for COVID-19-related outcomes, rs766826, is highlighted in blue. LD was calculated based on 8,350 unrelated white-British participants of the Fenland cohort.

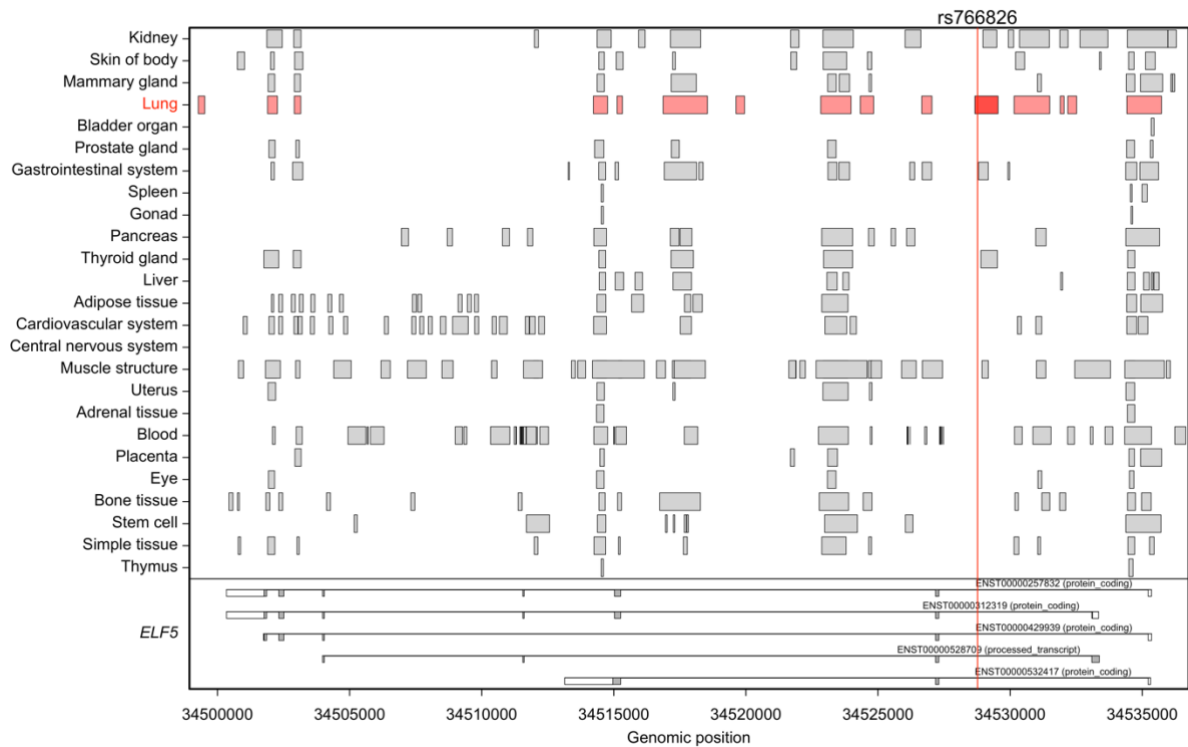

**Supplementary Figure 4 Open chromatin regions at *ELF5* across various tissues.** Each colour bar indicates open chromatin regions identified using ATAC-seq experiments and tissues are ordered by *ELF5* expression according to GTEx v8. The relevant lung-specific region is highlighted in red. Data was obtained from <https://t2d.hugeamp.org/variant.html?variant=rs766826> and open chromatin regions in lung are based on experiments in alveolar type 2 cells (<https://cmdga.org/annotations/DSR063NOE/>). Position of all available *ELF5* transcripts from ENSEMBL are depicted underneath. The position of rs766826 is highlighted by a red bar.



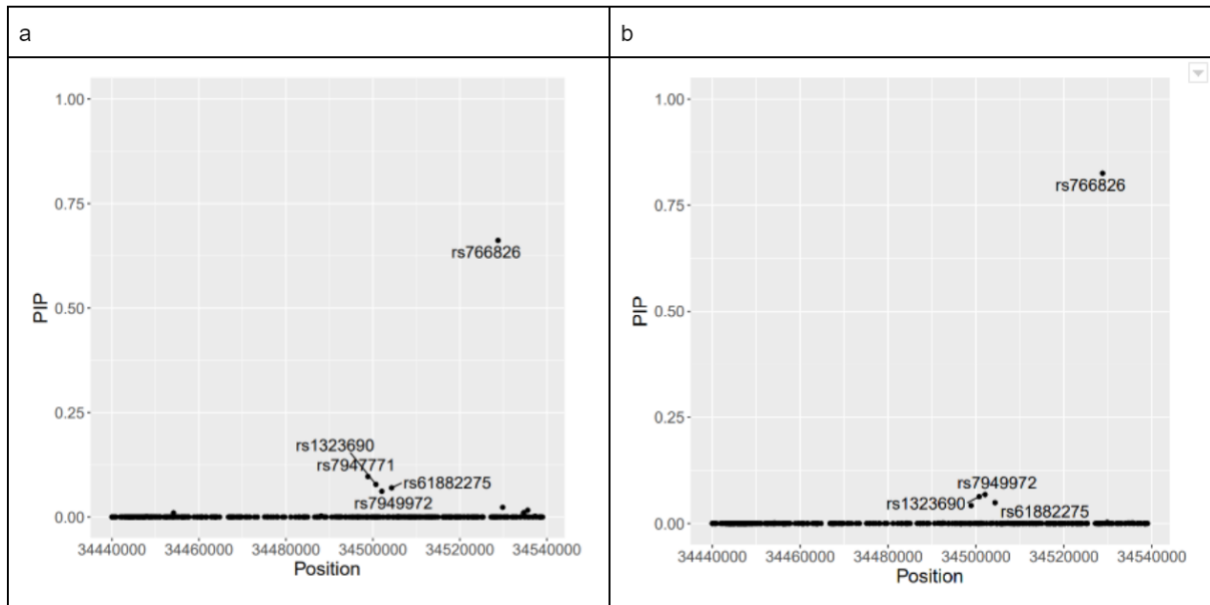

**Supplemental Figure 5 Results of multi-ethnic fine-mapping at the *ELF5* locus.** Posterior inclusion probabilities from fine-mapping based on European (a) and African (b) ancestry results are shown for each biallelic variants at the *ELF5* locus (chr11:34440000-34540000). Variants included in the 95%-credible set are annotated.

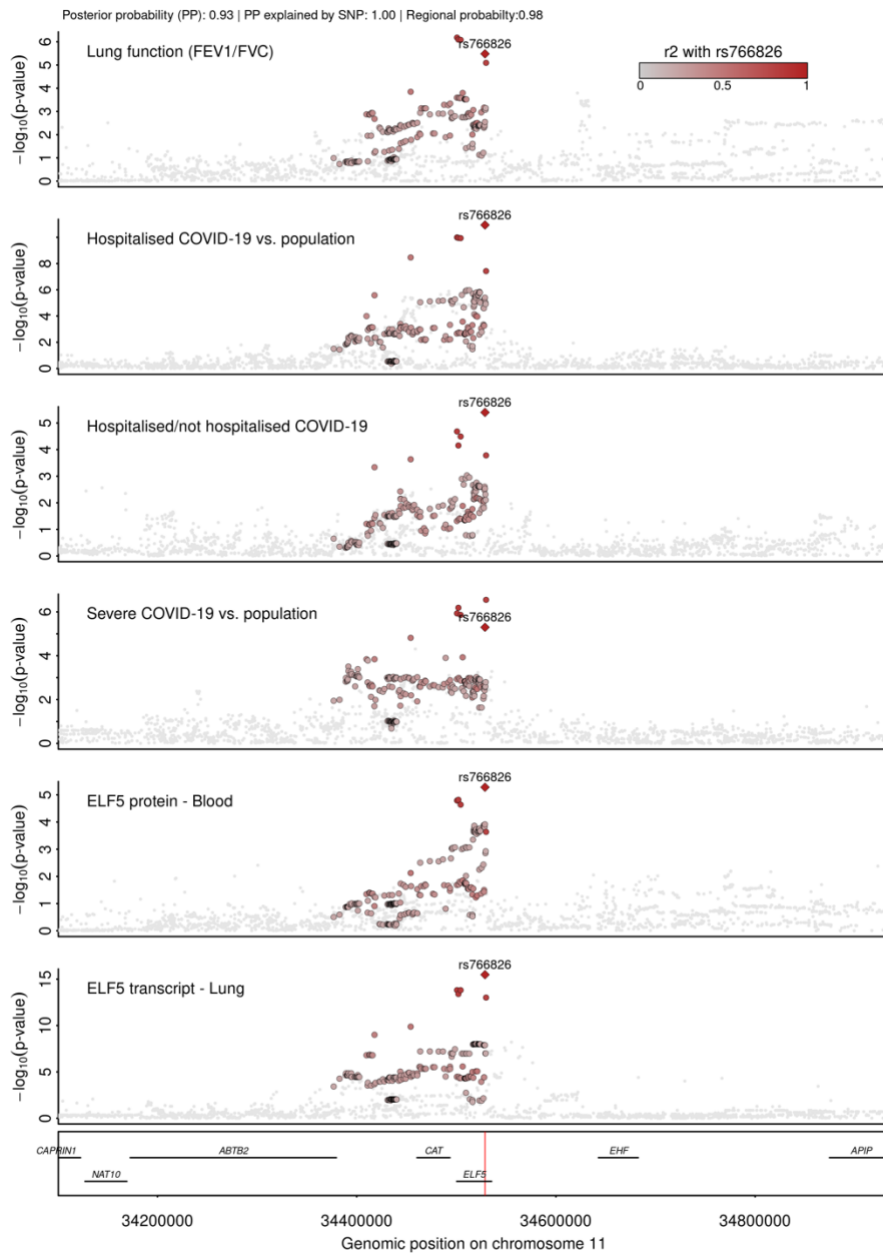

**Supplementary Figure 6 Stacked regional association plots at *ELF5*.** Each panel contains regional association statistics (p-values) for the trait listed in the upper left corner along genomic coordinates. Each dot represents a single nucleotide polymorphisms and colours indicate linkage disequilibrium (LD;  $r^2$ ) with the most likely causative variant (rs766826) at this locus (darker colours stronger LD). This figure is similar to Figure 2 in the main text, but now also including summary statistics for the FEV1/FCV ratio as a measure of lung function taken from Shrine *et al.*<sup>2</sup>. LD was calculated based on 8,350 unrelated white-British participants of the Fenland cohort.

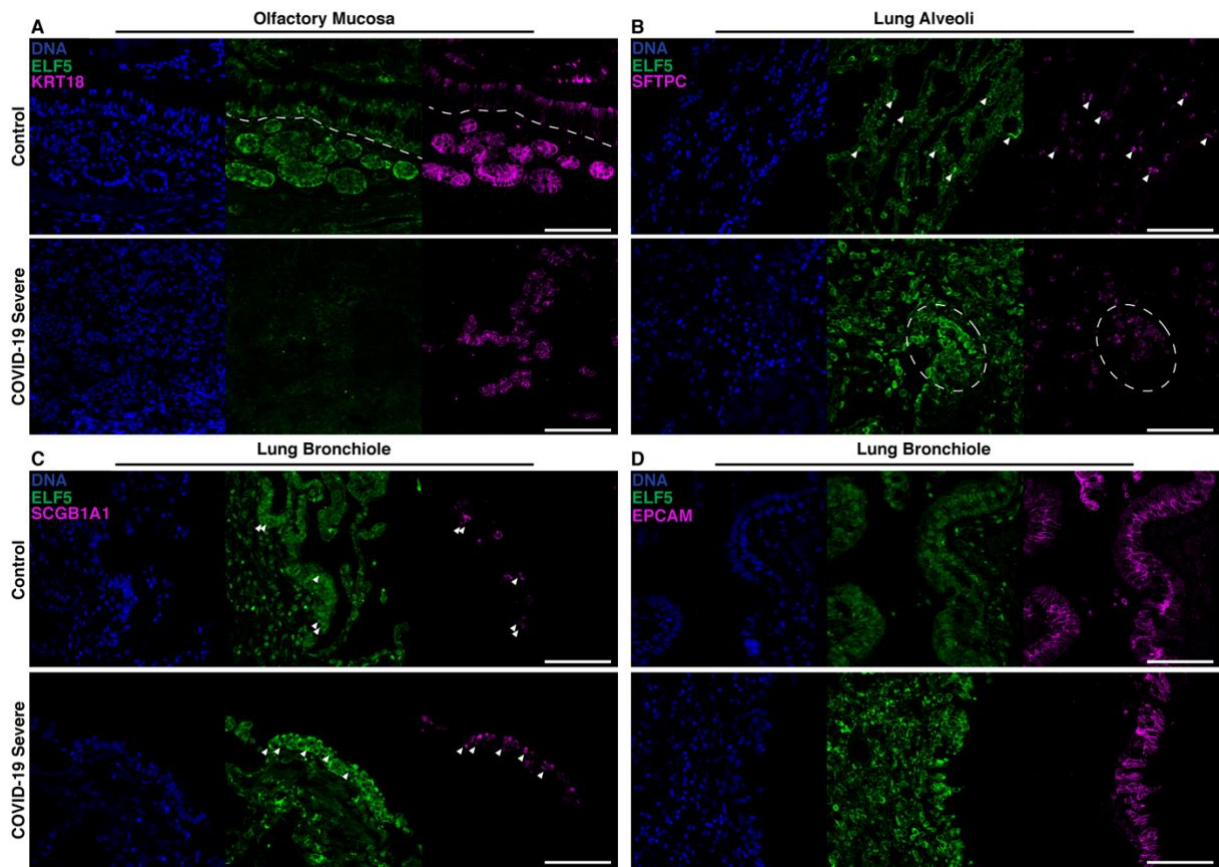

**Supplementary Figure 7 ELF5 expression by epithelial cells of the olfactory mucosa and lung.** Immunofluorescent staining of ELF5 in separate channels in control and COVID-19 patients in the **A** olfactory mucosa, **B** lung alveoli, and **C-D** lung bronchiole. **A** Dashed lines separate the olfactory epithelium and the lamina propria. **B** Arrowheads highlight AT2 cells expressing ELF5; dashed outline highlights clusters of AT2 cells expressing ELF5. **C** left: Arrowheads highlight secretory cells expressing ELF5; right: arrowheads highlight airway epithelial cells expressing ELF5. Marker genes for sustentacular and Bowman gland cells (**A**, KRT18), alveolar type II cells (**B**, SFTPC), secretory cells (**C**, SCGB1A1), and epithelial cells (**D**, EPCAM) are shown in purple. Validation staining for each tissue: control (n = 2); COVID-19 (n = 2). Scale bar = 100 $\mu$ m.

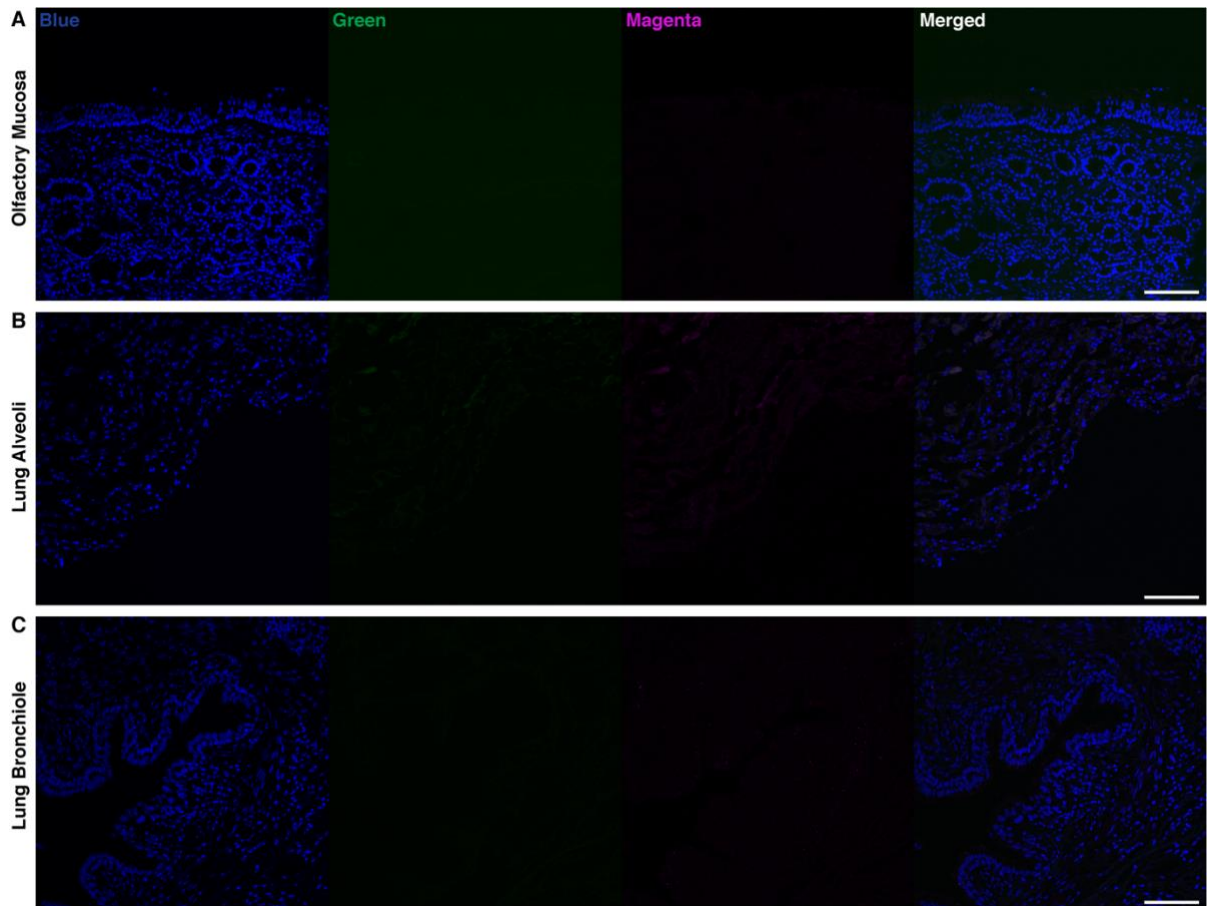

**Supplementary Figure 8. No primary antibody controls of the olfactory mucosa and lung.** Representative images of negative controls for the **A** olfactory mucosa, **B** lung alveoli, and **C** lung bronchiole under high laser power. Validation staining for each tissue: control (n = 2). Scale bar = 100 $\mu$ m.

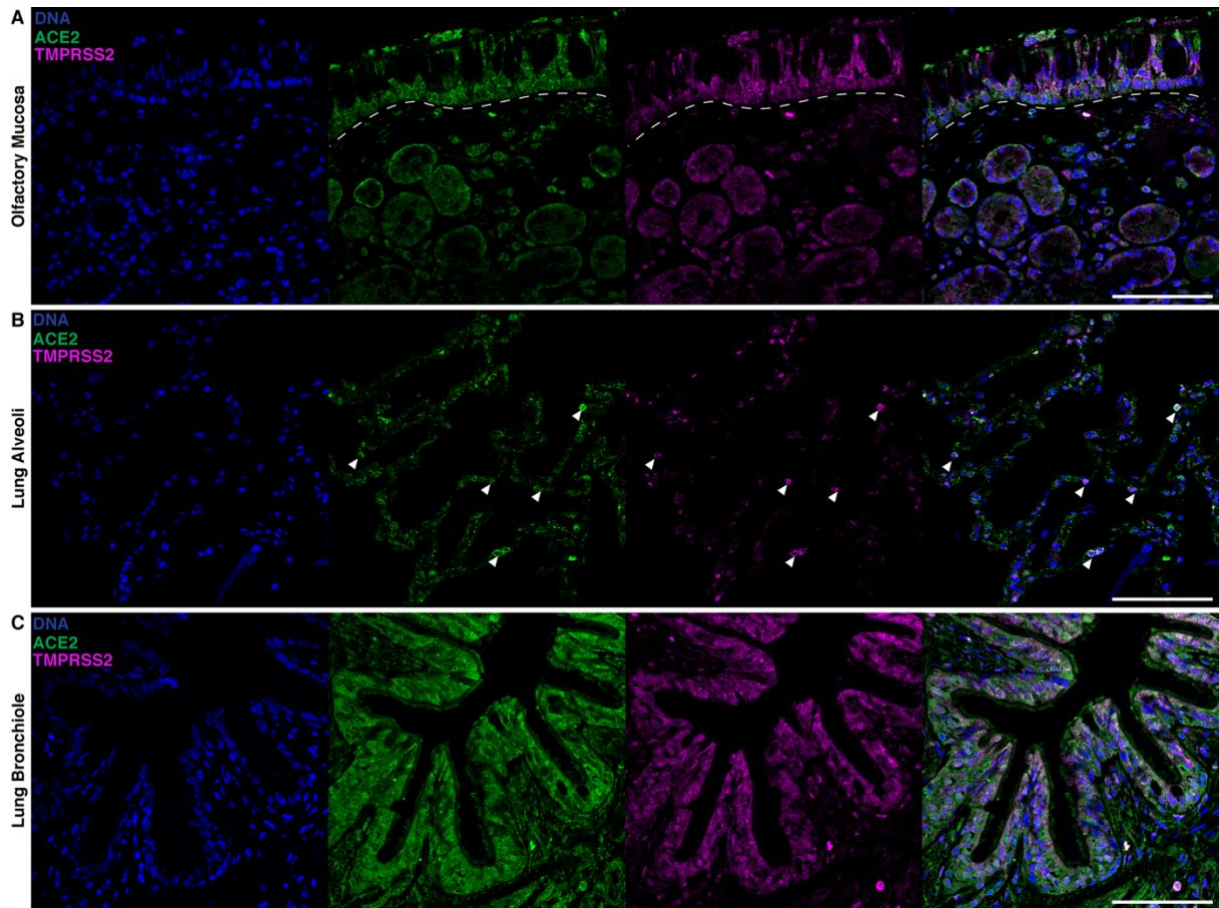

**Supplementary Figure 9. ACE2 and TMPRSS2 are expressed by different epithelial cells of the olfactory mucosa and the lung. A** Sustentacular cells, horizontal basal cells, and Bowman gland cells of the olfactory mucosa co-express ACE2 and TMPRSS2. **B** Arrows highlight punctuated expression of TMPRSS2 reflecting the distribution of AT2 cells together with ACE2. **C** Airway epithelial cells of the bronchioles expressing ACE2 and TMPRSS2. Validation staining for each tissue: control (n = 2). Scale bar = 100 $\mu$ m.

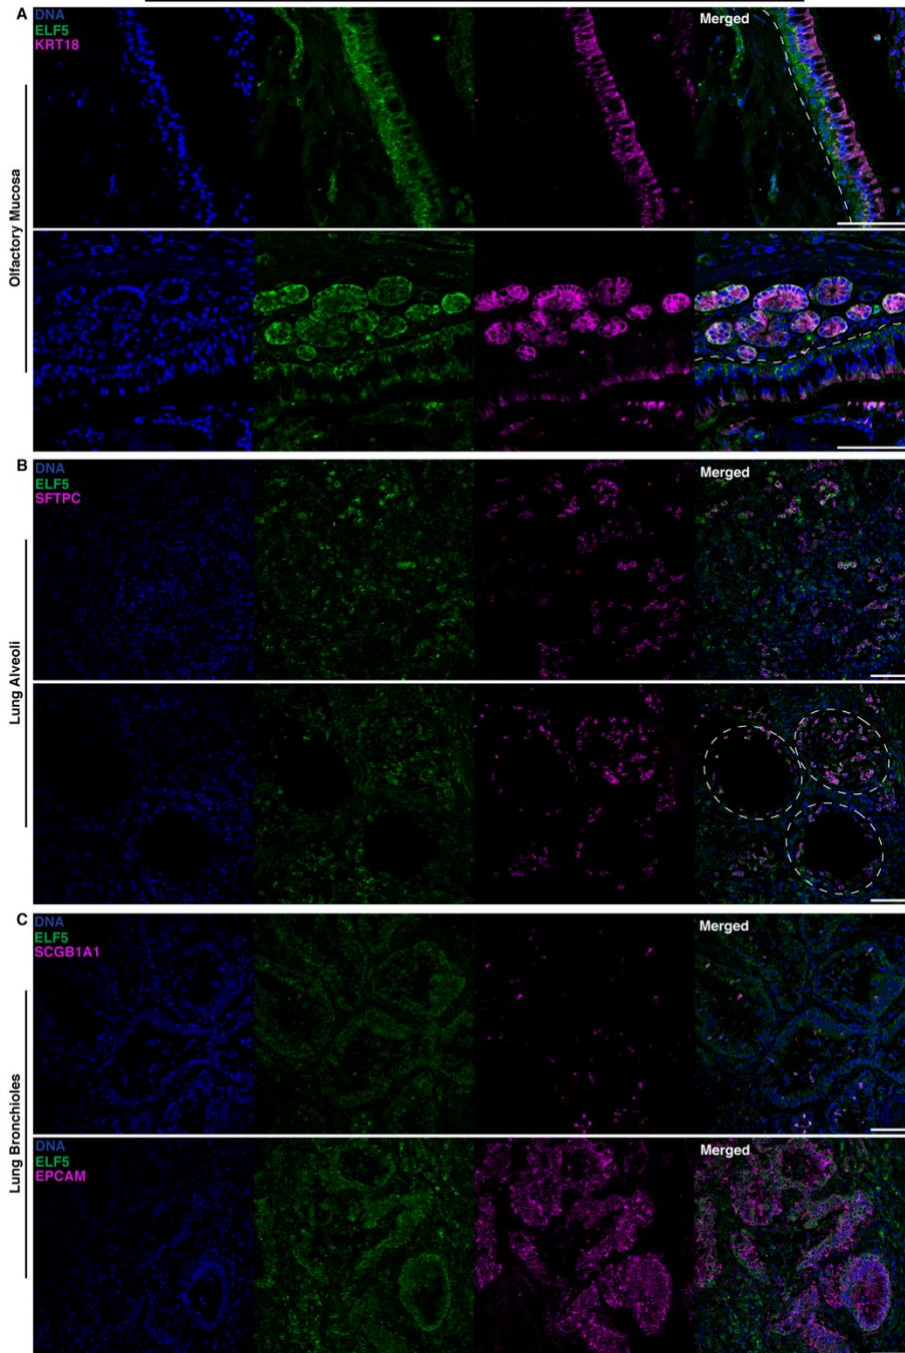

**Supplementary Figure 10. ELF5 expression by epithelial cells of the olfactory mucosa and lung in COVID-19 cases with longer disease duration.** Immunofluorescent staining of ELF5 in separate channels of COVID-19 patients that died after hospitalization after 14 days. ELF5 expression in the **A** olfactory mucosa, **B** lung alveoli, and **C** lung bronchiole. **A** Dashed lines separate the olfactory epithelium and the lamina propria. **B** dashed outline highlights clusters of AT2 cells expressing ELF5. Marker genes for sustentacular and Bowman gland cells (**A**, KRT18), alveolar type II cells (**B**, SFTPC), secretory cells (**C**, SCGB1A1), and epithelial cells (**C**, EPCAM) are shown in purple. Validation staining for each tissue: control (n = 2); COVID-19 (n = 2). Scale bar = 100 $\mu$ m.

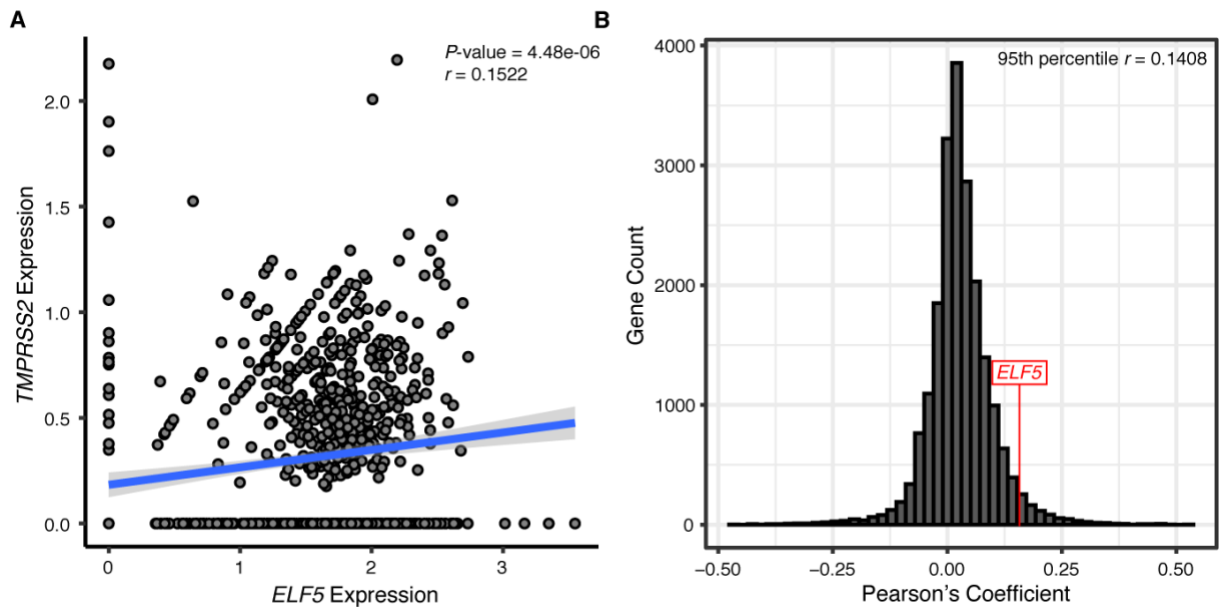

**Supplementary Figure 11. Co-expression of ELF5 and TMPRSS2.** A Scatterplot opposing normalised expression levels of ELF5 and TMPRSS2 in sustentacular cells of the olfactory mucosa. The blue line indicates a linear regression fit (error band indicating a 95% confidence level interval) and correlation coefficient and p-value are given in the legend. B Distribution of correlation coefficients of pairwise gene expression across all genes detected in sustentacular cells. The red line indicates where the ELF5 – TMPRSS2 correlations is placed.

### Olfactory mucosa – Secretory cells

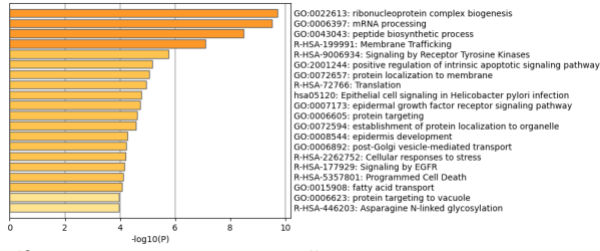

### Olfactory mucosa – Sustentacular cells

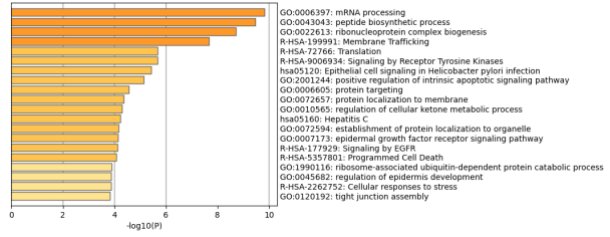

### Olfactory mucosa – Bowman cells

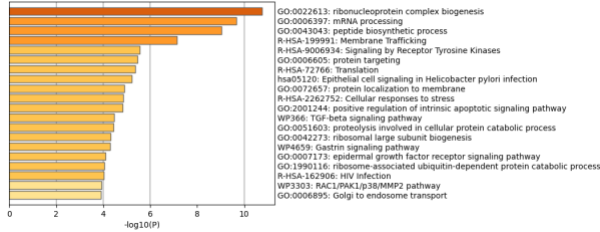

### Nasopharynx – Secretory cells

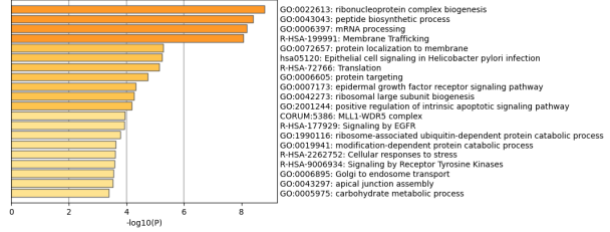

### Lung – Secretory cells

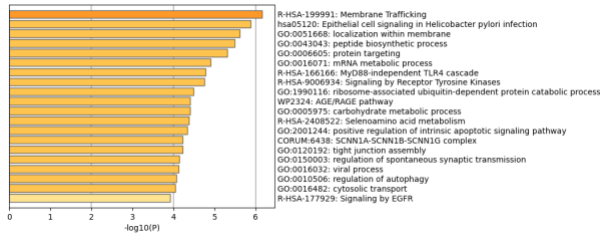

**Supplementary Figure 12.** Results from cell-type specific pathway enrichment analysis for predicted ELF5 targets.



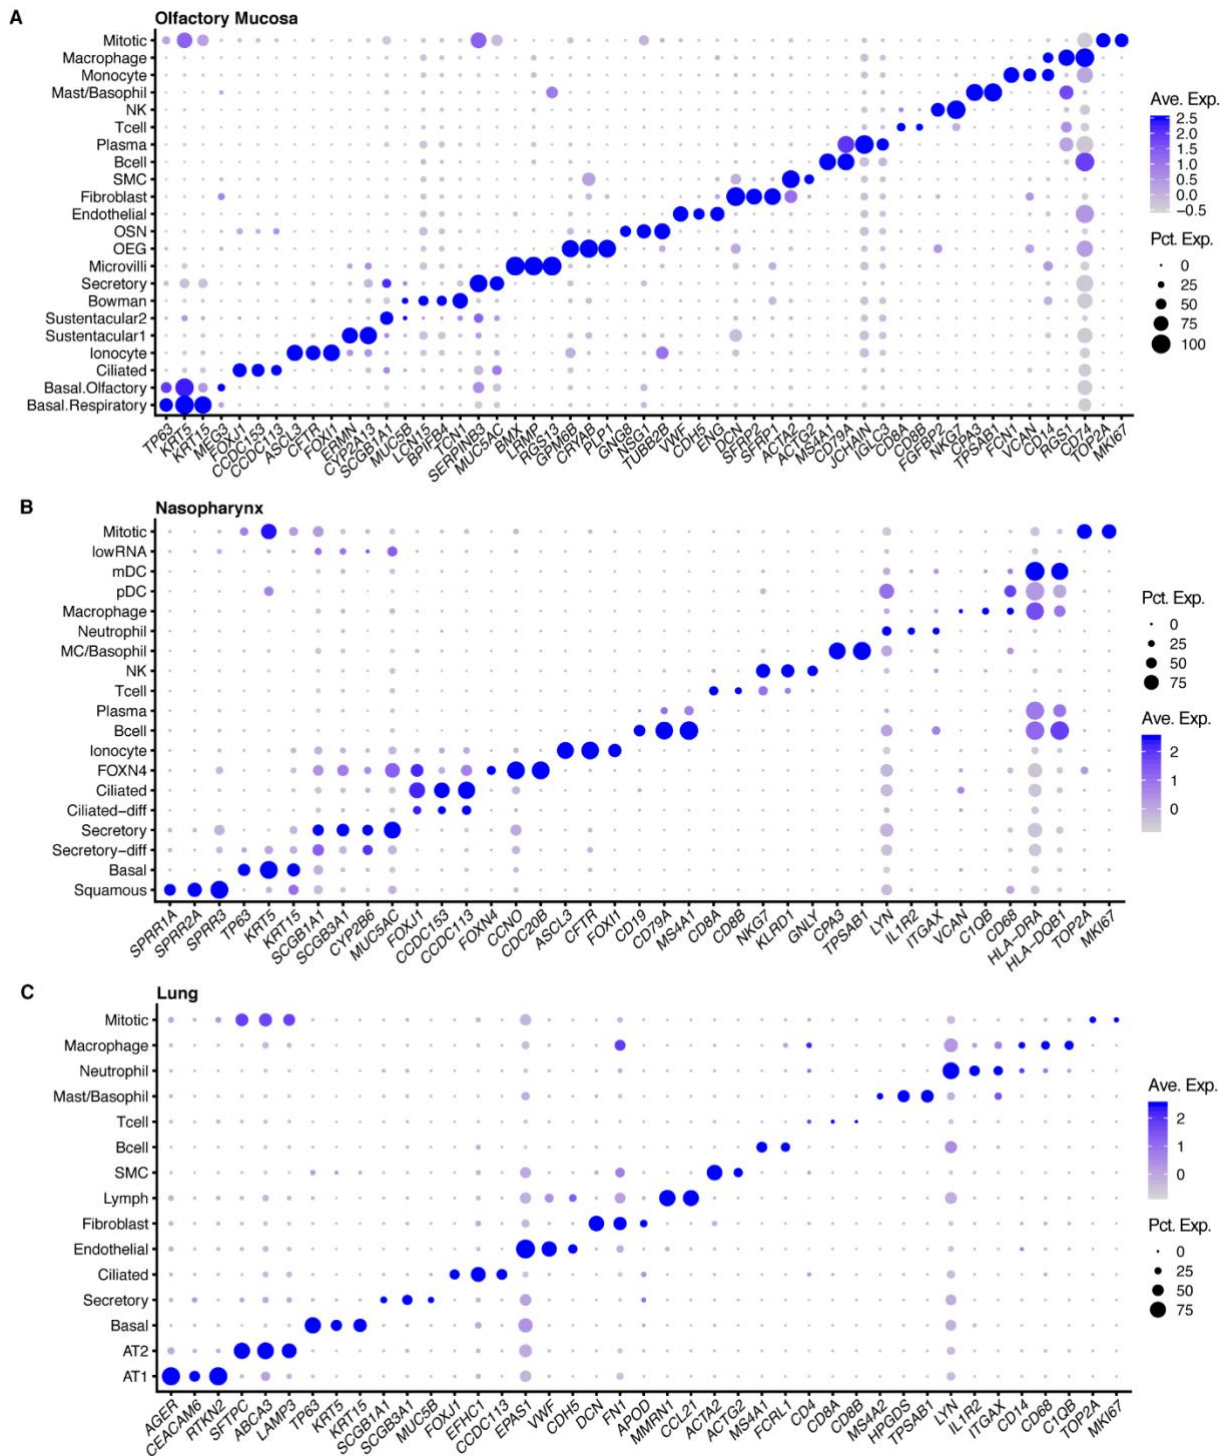

**Supplemental Figure 13.** Cell-specific expression of marker genes used for single cell annotation across the three tissue data sets used: **A** olfactory mucosa, **B** nasopharynx, and **C** lung. Higher expression levels are indicated by darker shades and the size of the circle reflects the percentage of cells expressing the corresponding marker gene.
